# Supplementary material for: HOCl-producing electrochemical bandage is active in murine polymicrobial wound infection
Source: PubMed Central journal article supplement (PMC11448380; doi:10.1128/spectrum.00626-24), 2024-08-20
Supplement: spectrum.00626-24-s0001.pdf [file spectrum.00626-24-s0001.pdf]

# Guide to scoring of *in vivo* biofilm from SEM images

Mayo Clinic Infectious Diseases Research Laboratory

*In vivo* biofilms are scored based on the following criteria:

1. Extracellular polymeric substance (EPS) integrity/abundance
2. Integrity of microbial cells
3. Microbial abundance

# EPS integrity/abundance examples: Stringy EPS

**High: 3**

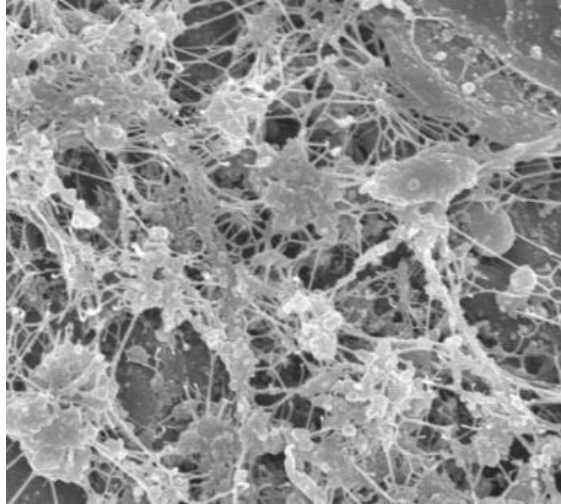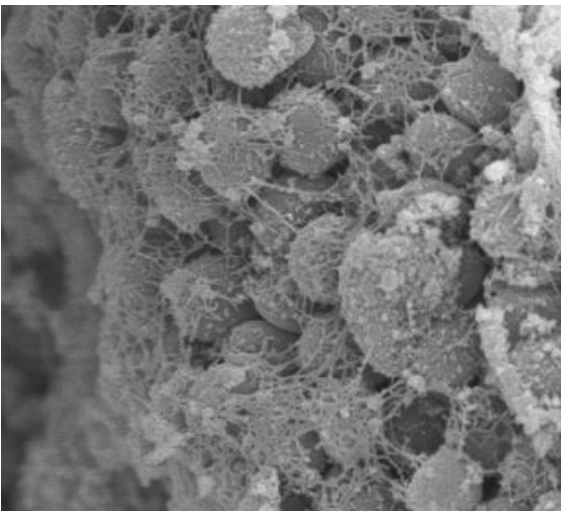

**Medium: 2**

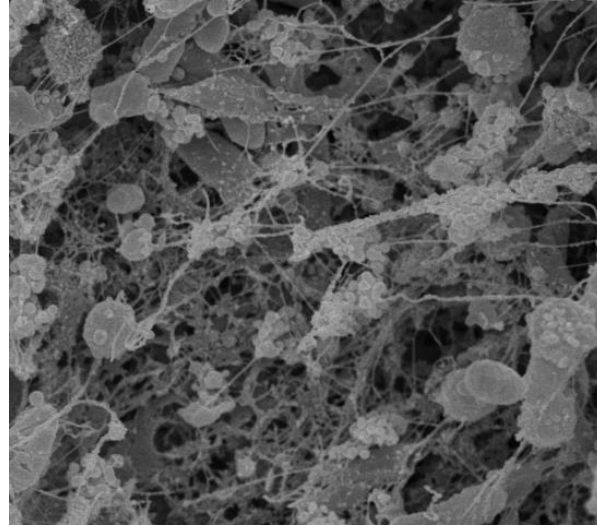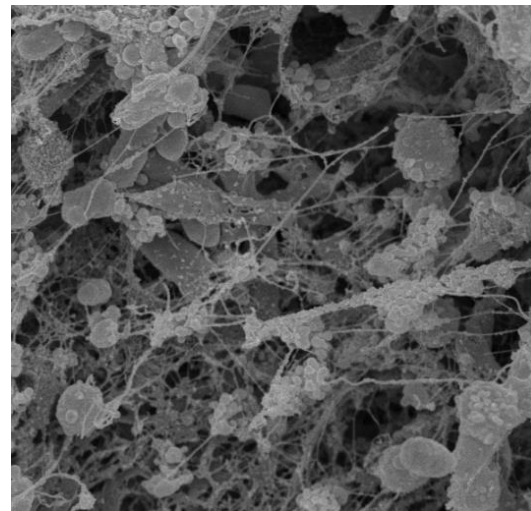

**Low: 1**

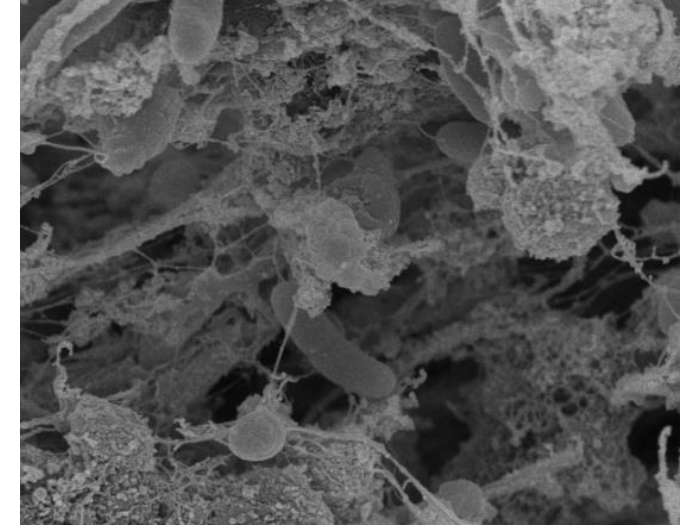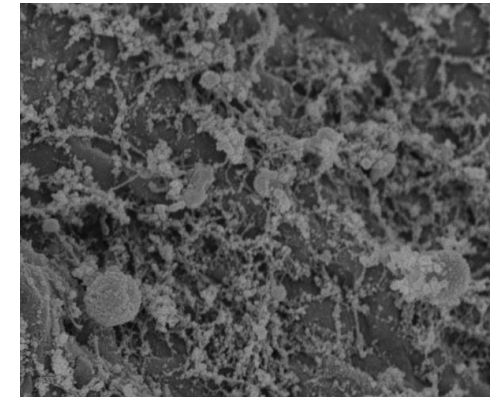

# EPS integrity/abundance examples: Granulated EPS

**High: 3**

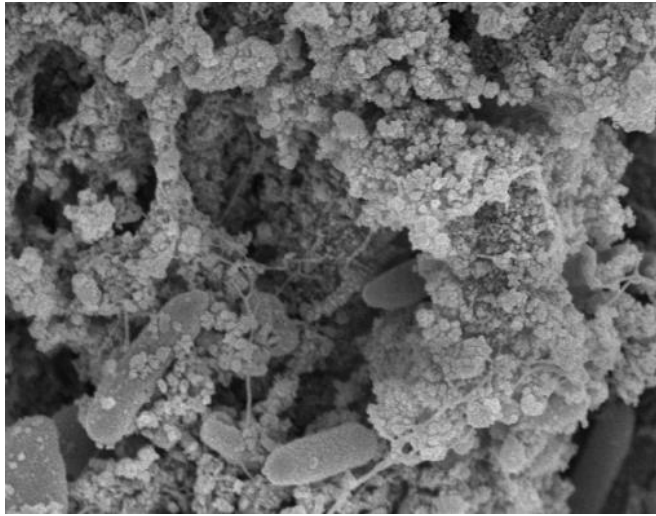

**Medium: 2**

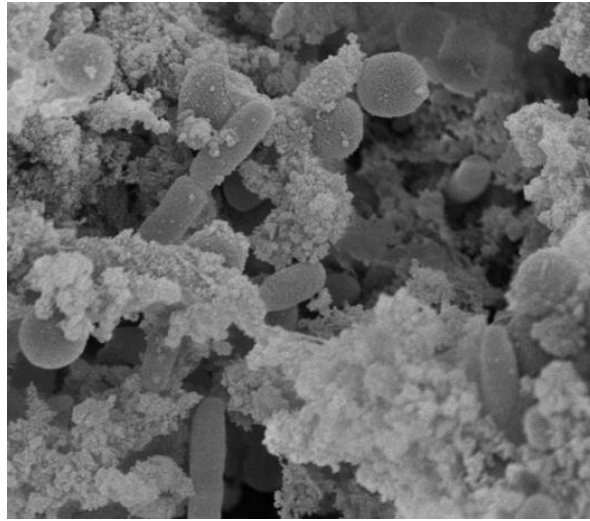

**Low: 1**

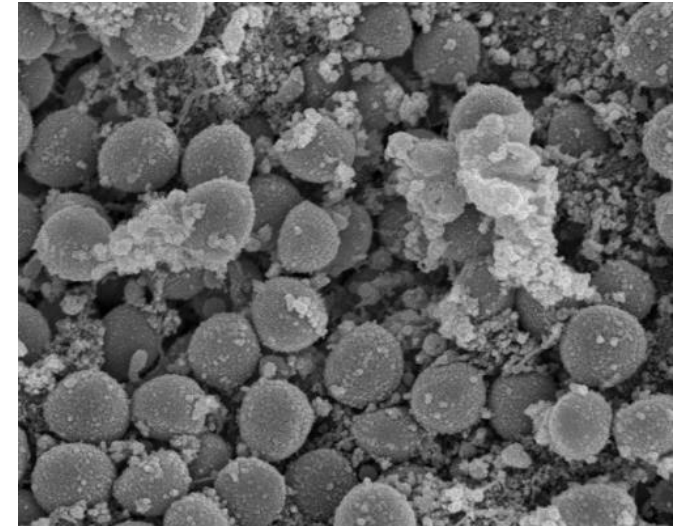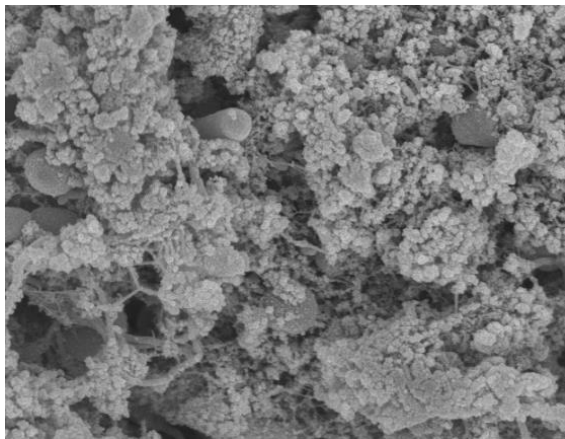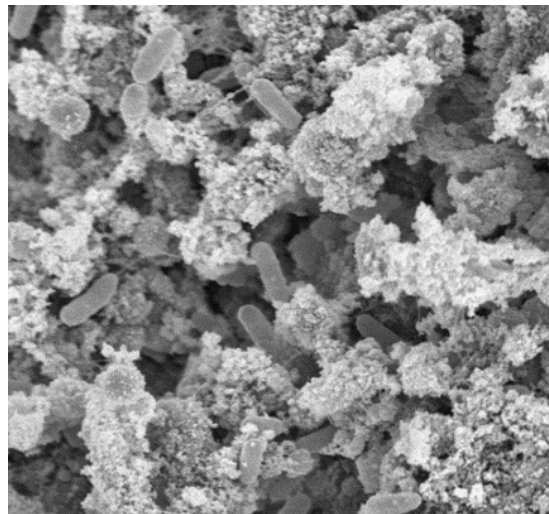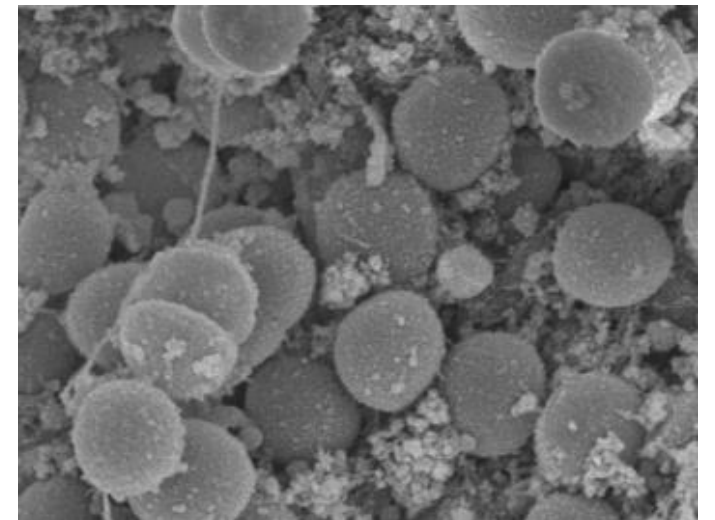

# EPS integrity/abundance examples: Combination EPS

**High: 3**

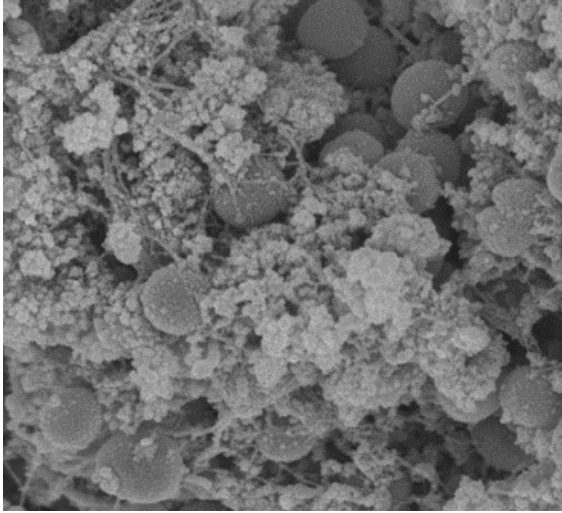

**Medium: 2**

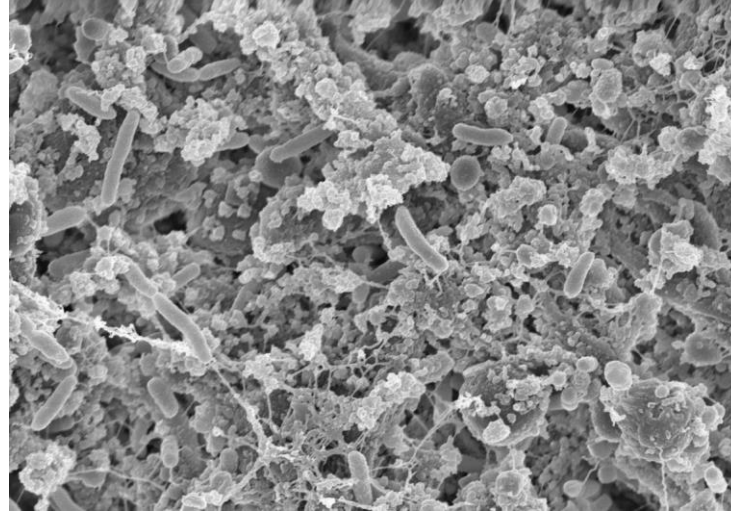

**Low: 1**

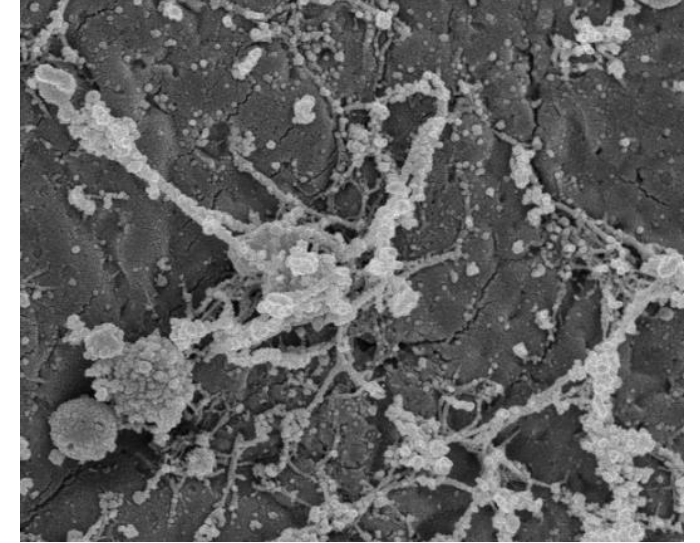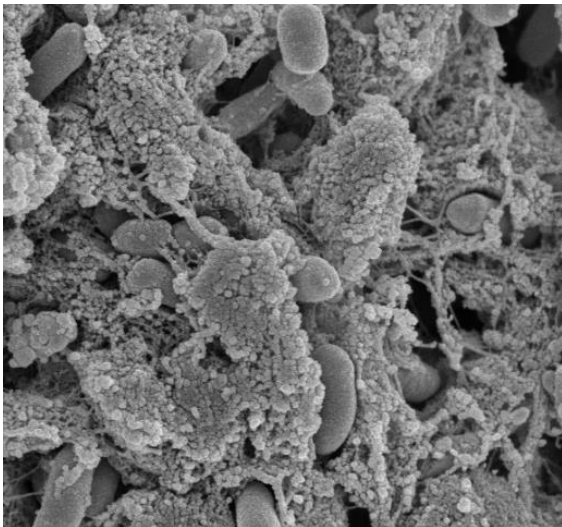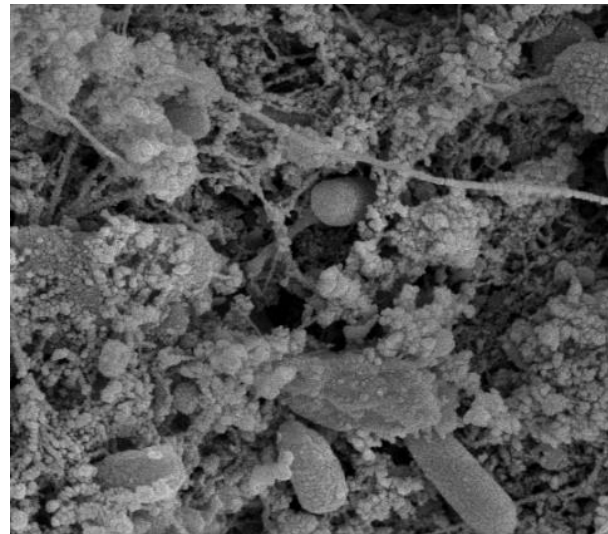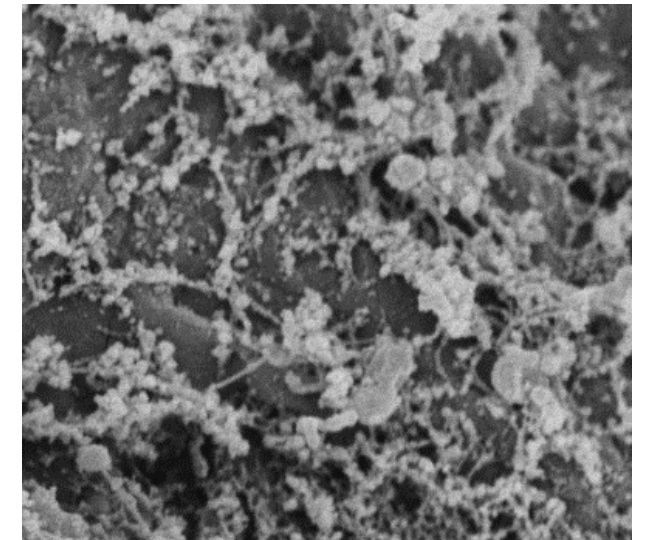

# Microbial cell integrity examples

- Shortening
- Compacting

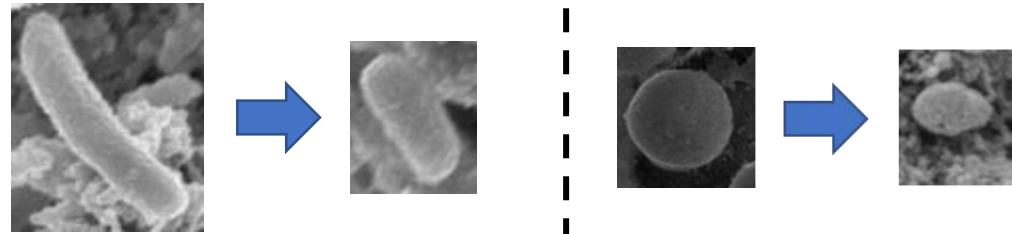

**NOT Shortening/Compacting**  
Appearance of shrinking due to depth of field of view (in comparison to larger-looking cells closer to the surface)

- Dimpling

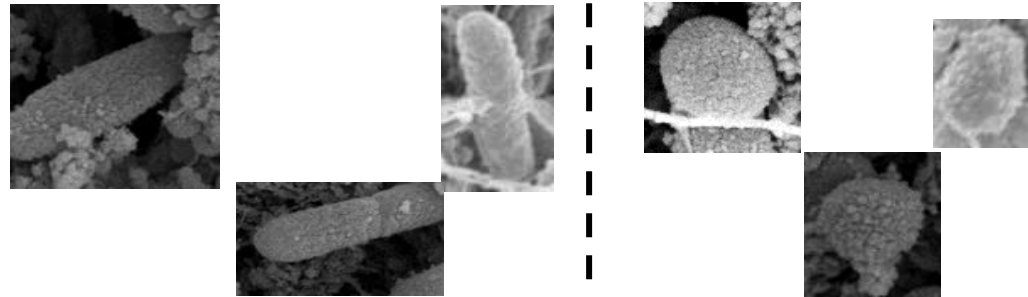

**NOT Dimpling/Blistering**

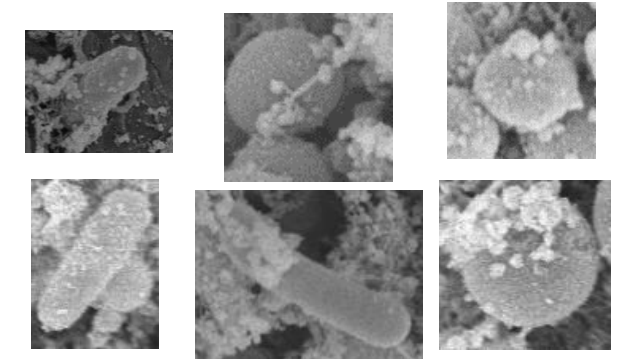

- Blistering

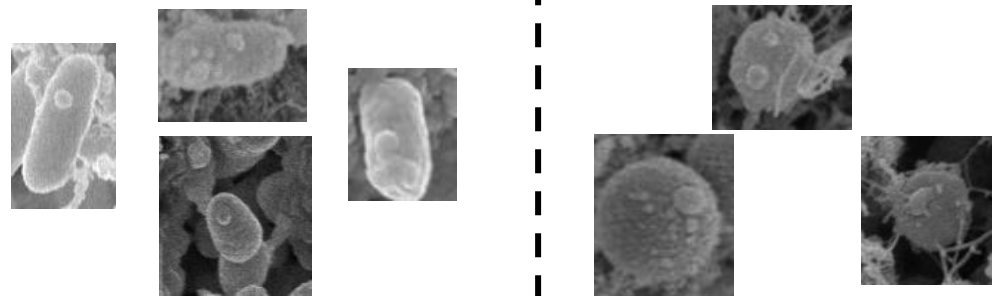

EPS Deposition:  
Bright, speckled, not a part of the membrane

- Active Lysis

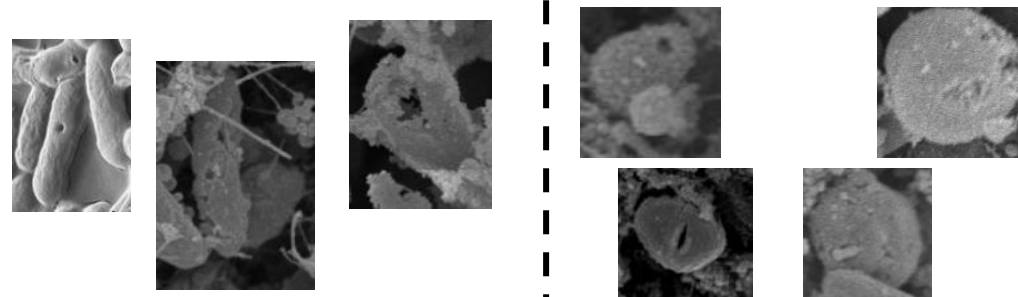

Active lysis is evident when the bacterial membrane breaks down (fractures, holes, fissures)

# Microbial cell integrity scoring

- Compacting, dimpling, blistering, lysis evident in:
  - **High (3):**  $\geq 25\%$  of cells
  - **Medium (2):** 10-25% of cells
  - **Low: (1):**  $\leq 10\%$  of cells

# Microbial abundance (EPS abundance must be scored first)

- **High (3):**  $\geq 75$  cells/field of view (10,000X mag) in *low-density EPS* or cells visibly prevalent throughout *high-density EPS*
- **Medium (2):** 25-75 cells/field of view (10,000X mag) in *low density EPS* or cells prevalently associated with *medium-density EPS* or cells sparsely associated with *high-density EPS*
- **Low (1):**  $\leq 25$  cells/field of view (10,000X mag) in *low-density EPS* or cells sparsely associated with *medium- or high-density EPS*



# Example scoring sheet (General impressions from 3-4 fields of view per sample)

| Sample | EPS integrity/abundance | Microbial cell integrity | Microbial abundance |
|--------|-------------------------|--------------------------|---------------------|
| S1     | 3                       | 3                        | 3                   |
| S2     | 2                       | 3                        | 2                   |
| S3     | 1                       | 2                        | 1                   |
| S4     | 2                       | 1                        | 3                   |
| S5     | 1                       | 1                        | 2                   |
| S6     | 2                       | 1                        | 3                   |
| S7     | 2                       | 2                        | 1                   |
